# Supplementary material
Source: MDPI journal article supplement (https://www.mdpi.com/2072-4292/8/10/872)
Supplement: s1 [file s1]

# Supplementary Materials: Variability in Dry Mixed-Grass Prairie Yield: A Comparison of MODIS, SPOT, and Field Measurements

Donald C. Wehlage, John A. Gamon, Donnette Thayer and David Hildebrand

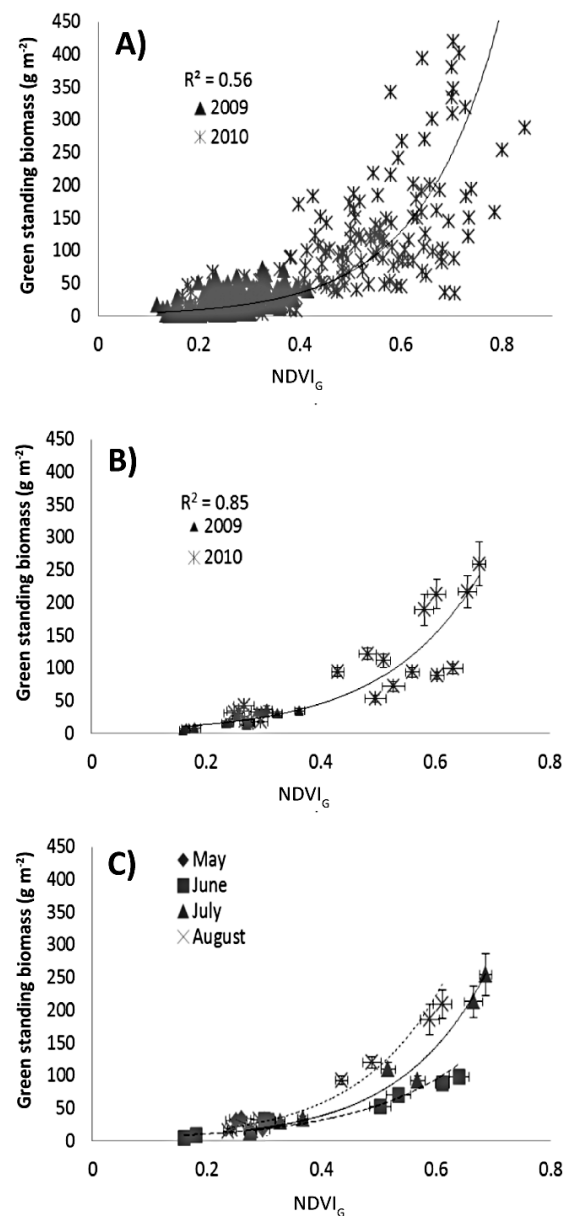

**Figure S1.** Effect of spatial data aggregation and temporal filtering on the relationship between NDVI<sub>G</sub> and green standing biomass from the Pinhorn and Sounding Creek grazing reserves in 2009 and 2010. (A) Raw (unaggregated) data, where each data point represents a single ground sampling point ( $N = 1$ ). (B) The same data aggregated (averaged) for all 10 sites within each grazing reserve by month, which better matched NDVI<sub>G</sub> to the scale of the satellite pixels (see Figures 1 and 2 for further details). (C) The same data as Panel B, with separate symbols and fits for individual months (May, June, July, and August). Aggregation and filtering allowed us to illustrate the NDVI–biomass relationships during the peak season (July; see Figure 7). All lines represent exponential fits.

**Table S1.** Mean site coordinates (degrees of latitude and longitude, measured in 2010) for Pinhorn (P) and Sounding Creek (S) grazing reserves. Measurements indicate repeated measures of the same sampling locations (see Figures 1 and 2), each with an error of approximately 10 m.

| Site | May                  | June                 | July                 | August               |
|------|----------------------|----------------------|----------------------|----------------------|
| P01  | NAN, NAN             | 49.14366, −110.8124  | 49.14368, −110.81236 | 49.14365, −110.81244 |
| P02  | 49.14934, −110.8202  | 49.14935, −110.82016 | 49.14938, −110.82018 | 49.14938, −110.82017 |
| P03  | 49.13859, −110.8315  | 49.13855, −110.83147 | 49.13856, −110.83143 | 49.13855, −110.83149 |
| P04  | 49.15069, −110.86387 | 49.15066, −110.86384 | 49.15063, −110.86379 | 49.15065, −110.86385 |
| P05  | 49.1517, −110.88833  | 49.15167, −110.88831 | 49.15169, −110.88834 | 49.15167, −110.88835 |
| P06  | 49.14124, −110.89009 | 49.14122, −110.89001 | 49.14124, −110.89001 | 49.14123, −110.89001 |
| P07  | 49.1519, −110.90251  | 49.15184, −110.90248 | 49.15187, −110.90245 | 49.15187, −110.90247 |
| P08  | 49.16117, −110.91185 | 49.16119, −110.91181 | 49.16118, −110.91179 | 49.16117, −110.91181 |
| P09  | 49.15653, −110.92411 | 49.1565, −110.92406  | 49.15652, −110.92403 | 49.15652, −110.92402 |
| P10  | 49.14196, −110.9209  | 49.14198, −110.92087 | 49.14196, −110.92088 | 49.14199, −110.92089 |
| S01  | 51.53393, −110.59132 | 51.53389, −110.59129 | 51.53387, −110.59127 | 51.53392, −110.5913  |
| S02  | 51.53445, −110.6079  | 51.53444, −110.60779 | 51.53445, −110.6078  | 51.53448, −110.60791 |
| S03  | 51.53564, −110.62561 | 51.53563, −110.62556 | 51.53564, −110.62558 | 51.53566, −110.62554 |
| S04  | 51.54657, −110.61903 | 51.54651, −110.619   | NAN, NAN             | 51.54655, −110.61902 |
| S05  | 51.53921, −110.65459 | 51.53922, −110.65454 | 51.53922, −110.65459 | 51.53922, −110.65457 |
| S06  | 51.54559, −110.66618 | 51.54557, −110.66607 | 51.54557, −110.66602 | 51.54558, −110.66609 |
| S07  | 51.55886, −110.66621 | 51.55884, −110.66614 | 51.5589, −110.66614  | 51.55885, −110.66615 |
| S08  | 51.56189, −110.65523 | 51.56184, −110.6552  | 51.56188, −110.65518 | 51.56189, −110.65516 |
| S09  | 51.56317, −110.66169 | 51.56315, −110.66164 | 51.56316, −110.66162 | 51.56318, −110.66169 |
| S10  | 51.5727, −110.67628  | 51.57268, −110.67627 | 51.5727, −110.67619  | 51.57268, −110.67629 |

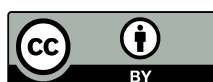

© 2016 by the authors; licensee MDPI, Basel, Switzerland. This article is an open access article distributed under the terms and conditions of the Creative Commons Attribution (CC-BY) license (<http://creativecommons.org/licenses/by/4.0/>).
